# Supplementary material for: Strengthening polylactic acid (PLA) composites with poly(methyl methacrylate)-functionalized cellulose nanofibrils created through grafting-through emulsion polymerization
Source: Royal Society of Chemistry journal article supplement (doi:10.1039/d3lp00248a), 2024-01-01
Supplement: d3lp00248a1.pdf [file d3lp00248a1.pdf]

**Supporting material for**  
**Strengthening polylactic acid (PLA) composites with poly(methyl methacrylate)-**  
**functionalized cellulose nanofibrils created through grafting-through emulsion**  
**polymerization**

**Hathaithep Senkum,<sup>1,2</sup> Peter V. Kelly,<sup>1,2</sup> Ahmad A. L. Ahmad,<sup>1,2</sup> Siamak Shams Es-**  
**haghi,<sup>2,3</sup> William M. Gramlich<sup>1,2,4,\*</sup>**

<sup>1</sup>Department of Chemistry, University of Maine, Orono, ME, 04469, USA

<sup>2</sup>Advanced Structures and Composites Center, University of Maine, Orono, ME 04469, USA

<sup>3</sup>Department of Chemical and Biomedical Engineering, University of Maine, Orono, ME, 04469, USA

<sup>4</sup>Forest Bioproducts Research Institute, University of Maine, Orono, ME, 04469, USA

\*Corresponding author: [william.gramlich@maine.edu](mailto:william.gramlich@maine.edu)

Table S1. Weight percent of PMMA on the cellulose surfaces before and after DCM purification

| Material    | Molar ratios of<br>MMA:cellobiose:KPS | % wt PMMA (before<br>DCM purification) | % wt PMMA (after<br>DCM purification) |
|-------------|---------------------------------------|----------------------------------------|---------------------------------------|
| PMMA-MetCNF | 50:1:0.06                             | 39 ± 6                                 | 32 ± 5                                |
| PMMA-MetCNF | 50:1:0.12                             | 41 ± 6                                 | 32 ± 5                                |

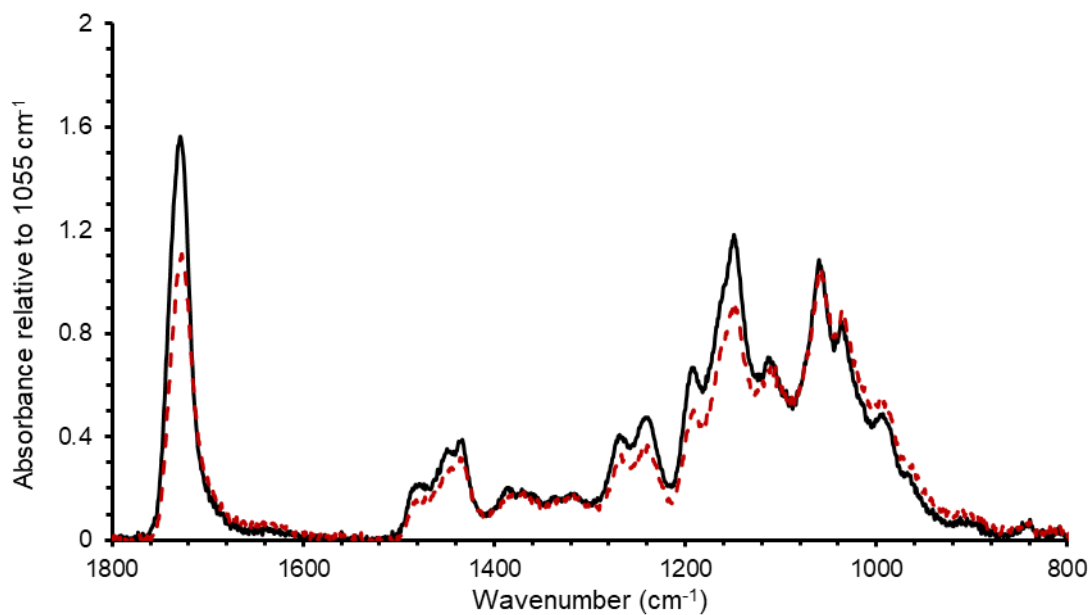

Figure S1. ATR-IR spectra of PMMA-MetCNFs (50:1:0.06) before (black solid line) and after DCM purification to remove non-covalently bound PMMA (red dashed line) normalized to the C-O stretching band of the cellulose at 1055 cm<sup>-1</sup>.

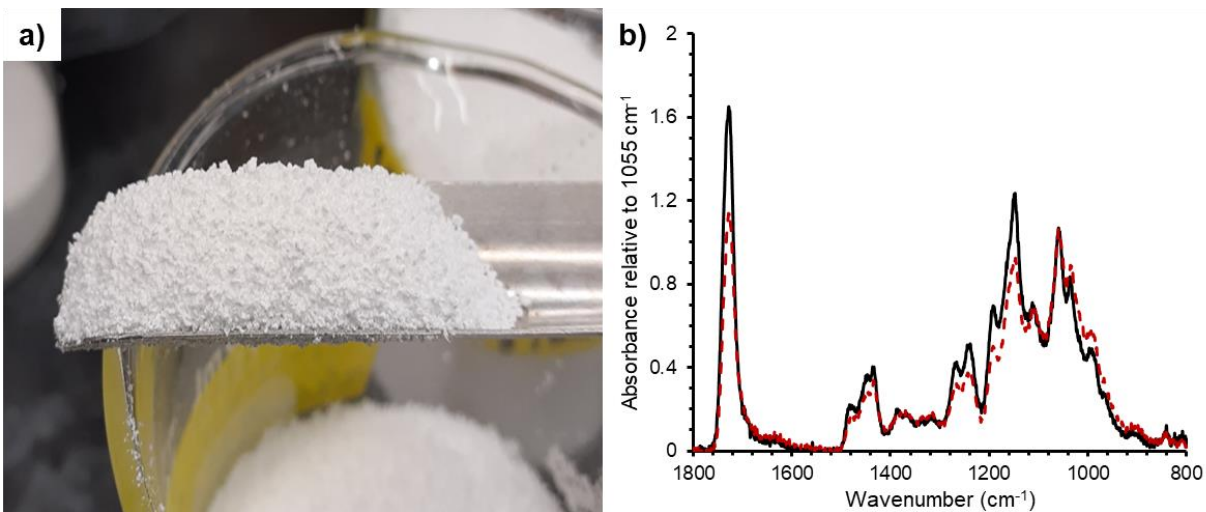

Figure S2. (A) Ground PMMA-MetCNFs (50:1:0.12) after vacuum-drying and grinding. B) ATR-IR spectra of PMMA-MetCNFs (50:1:0.12) before (black solid line) and after DCM purification to remove non-covalently bound PMMA (red dashed line) normalized to the C-O stretching band of the cellulose at 1055 cm<sup>-1</sup>.

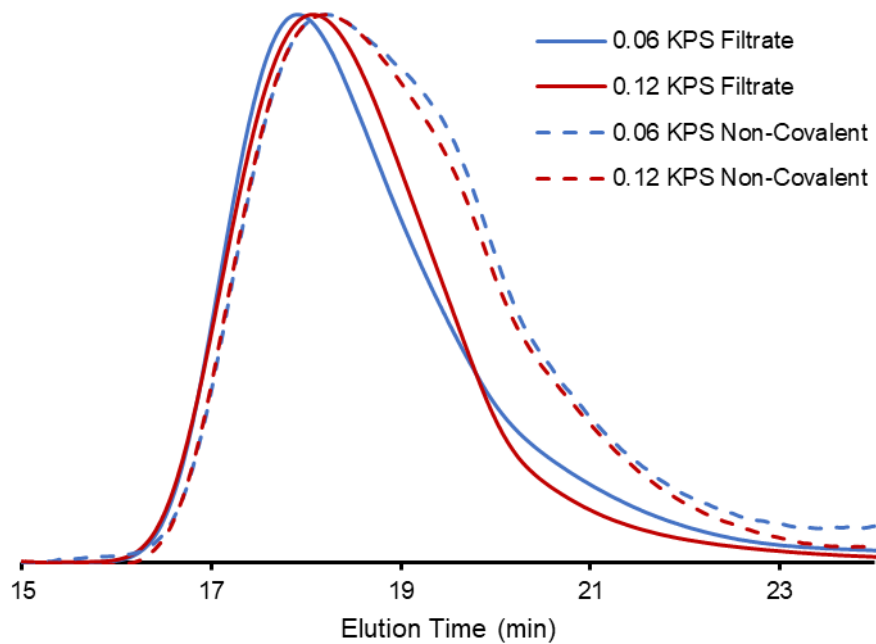

Figure S3. SEC elution curves of the PMMA filtrate (solid lines) and the non-covalently bound PMMA (dashed lines) for 50:1:0.06 (red lines) and 50:1:0.12 (blue lines) molar ratio conditions.

Table S2. SEC data for peak molecular weight ( $M_p$ ), number average molecular weight ( $M_n$ ), and dispersity ( $\mathcal{D}$ ) for the PMMA filtrate particles (SFEP particles) and noncovalently bound polymer extracted from the PMMA-MetCNFs synthesized at the MMA:cellobiose:KPS molar ratios given as reaction conditions.

| <i>Reaction Conditions</i> | <i>Collected Polymer</i> | $M_p$ (kg/mol) | $M_n$ (kg/mol) | $\mathcal{D}$ |
|----------------------------|--------------------------|----------------|----------------|---------------|
| 50:1:0.06                  | Filtrate                 | 903            | 126            | 5.94          |
| 50:1:0.06                  | Non-covalent             | 692            | 150            | 3.72          |
| 50:1:0.12                  | Filtrate                 | 790            | 211            | 3.64          |
| 50:1:0.12                  | Non-covalent             | 697            | 143            | 4.10          |

a

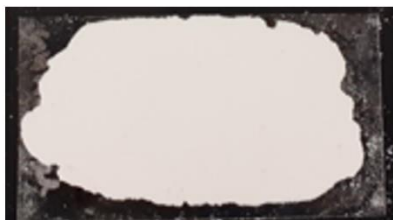

b

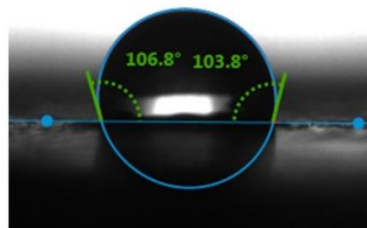

Figure S4. (A) Representative specimen of the ground PMMA-MetCNFs (50:1:0.06) that was compressed on a glass slide at 500 psi for 5 minutes under ambient temperature for static water contact angle measurement. (B) Representative static water contact angle droplet on PMMA-MetCNFs (50:1:0.06) surface at 15 seconds.

Table S3. Measured dispersive ( $\gamma^d$ ), polar ( $\gamma^{sp}$ ), acceptor ( $\gamma^+$ ), donor ( $\gamma^-$ ), and total ( $\gamma$ ) surface energy components for PMMA-MetCNFs and PLA.

| 50:1:0.06        |                                    |                                       |                                    |                                    |                                  |
|------------------|------------------------------------|---------------------------------------|------------------------------------|------------------------------------|----------------------------------|
| n/n <sub>0</sub> | $\gamma^d$<br>(mJ/m <sup>2</sup> ) | $\gamma^{sp}$<br>(mJ/m <sup>2</sup> ) | $\gamma^-$<br>(mJ/m <sup>2</sup> ) | $\gamma^+$<br>(mJ/m <sup>2</sup> ) | $\gamma$<br>(mJ/m <sup>2</sup> ) |
| 0.01             | 47.2                               | 12.7                                  | 11.0                               | 3.6                                | 59.8                             |
| 0.02             | 40.9                               | 12.1                                  | 10.2                               | 3.6                                | 53.0                             |
| 0.03             | 35.8                               | 11.0                                  | 9.2                                | 3.3                                | 46.8                             |
| 0.05             | 33.8                               | 10.7                                  | 9.3                                | 3.1                                | 44.5                             |
| 0.10             | 25.5                               | 8.6                                   | 7.7                                | 2.4                                | 34.1                             |
| 50:1:0.12        |                                    |                                       |                                    |                                    |                                  |
| n/n <sub>0</sub> | $\gamma^d$<br>(mJ/m <sup>2</sup> ) | $\gamma^{sp}$<br>(mJ/m <sup>2</sup> ) | $\gamma^-$<br>(mJ/m <sup>2</sup> ) | $\gamma^+$<br>(mJ/m <sup>2</sup> ) | $\gamma$<br>(mJ/m <sup>2</sup> ) |
| 0.01             | 44.5                               | 12.3                                  | 10.7                               | 3.5                                | 56.8                             |
| 0.02             | 40.7                               | 11.5                                  | 10.5                               | 3.2                                | 52.3                             |
| 0.03             | 37.5                               | 10.8                                  | 9.9                                | 2.9                                | 48.3                             |
| 0.05             | 37.5                               | 11.0                                  | 10.3                               | 2.9                                | 48.5                             |
| 0.10             | 33.8                               | 10.9                                  | 10.1                               | 3.0                                | 44.7                             |
| PLA              |                                    |                                       |                                    |                                    |                                  |
| n/n <sub>0</sub> | $\gamma^d$<br>(mJ/m <sup>2</sup> ) | $\gamma^{sp}$<br>(mJ/m <sup>2</sup> ) | $\gamma^-$<br>(mJ/m <sup>2</sup> ) | $\gamma^+$<br>(mJ/m <sup>2</sup> ) | $\gamma$<br>(mJ/m <sup>2</sup> ) |
| 0.01             | 122.9                              | 35.6                                  | 53.9                               | 5.9                                | 158.5                            |
| 0.02             | 75.2                               | 22.8                                  | 32.0                               | 4.1                                | 97.9                             |
| 0.03             | 67.8                               | 19.0                                  | 29.3                               | 3.1                                | 86.8                             |
| 0.05             | 62.1                               | 17.4                                  | 27.0                               | 2.8                                | 79.5                             |
| 0.10             | 55.9                               | 15.6                                  | 24.2                               | 2.5                                | 71.5                             |



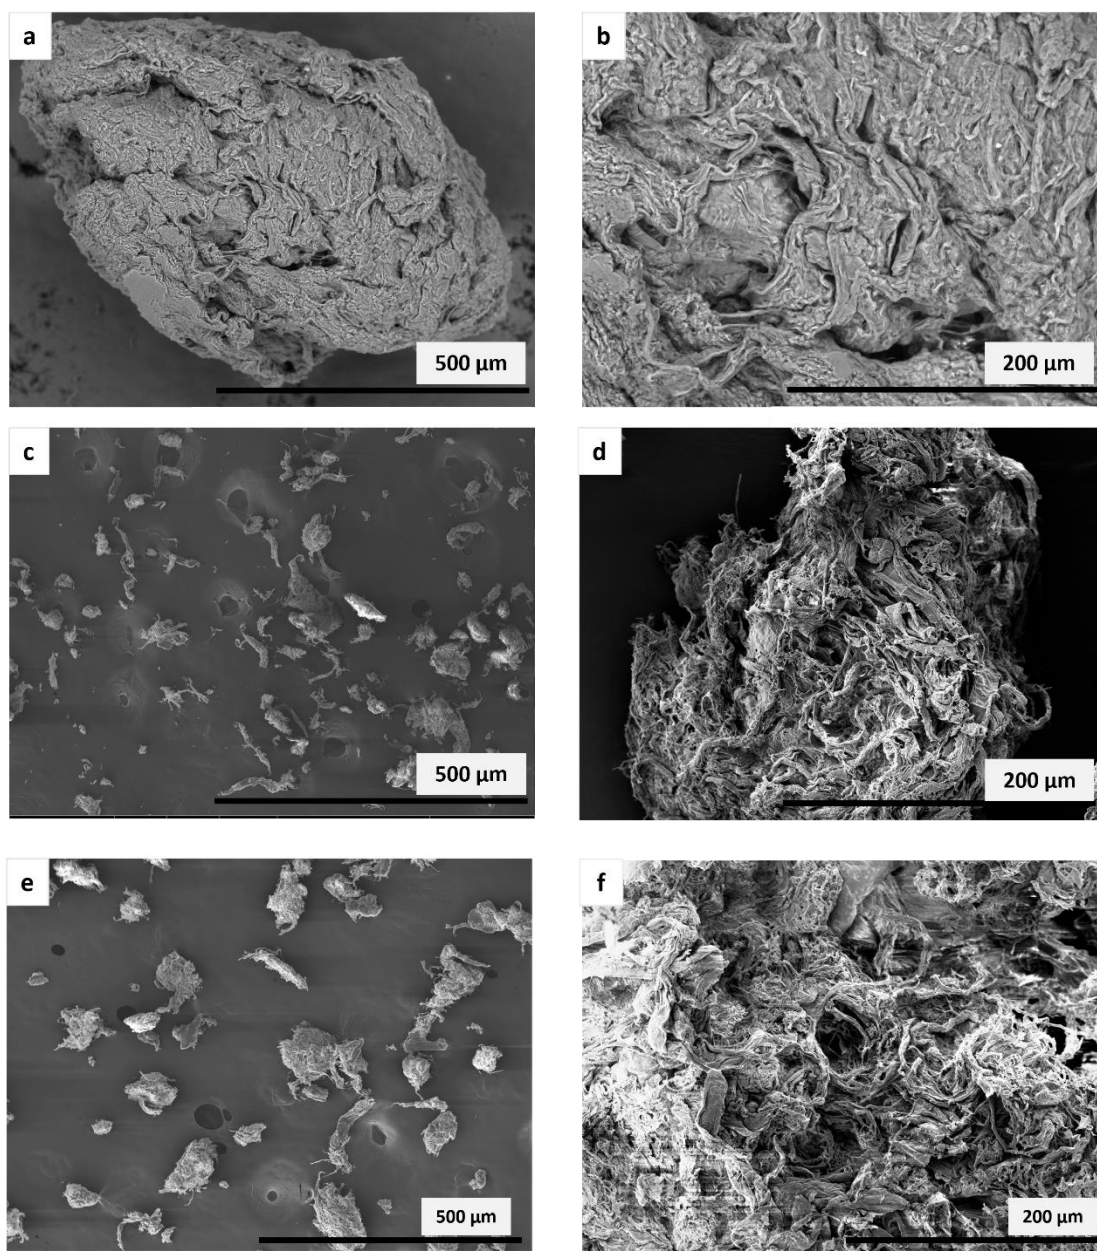

Figure S5. Representative SEM images of the (a and b) unmodified CNFs, (c and d) PMMA-MetCNFs (50:1:0.06), and (e and f) PMMA-MetCNFs (50:1:0.12) after drying and grinding at 200x magnification (left images) and at 500x magnification (right images).

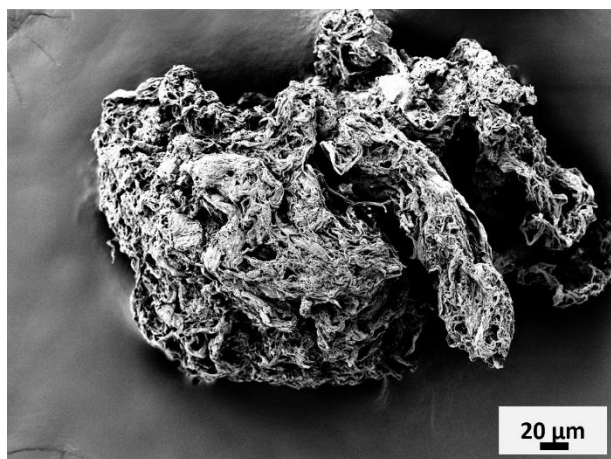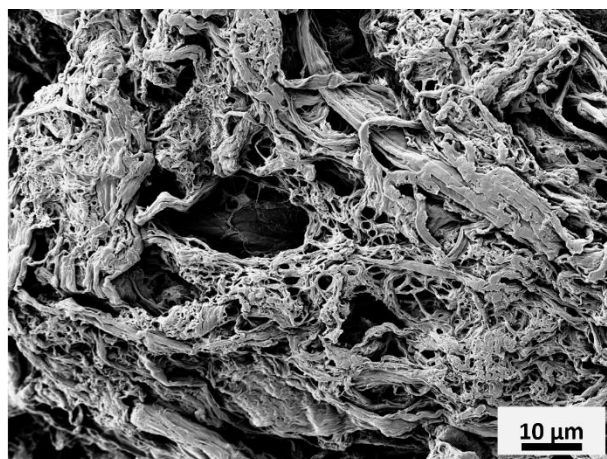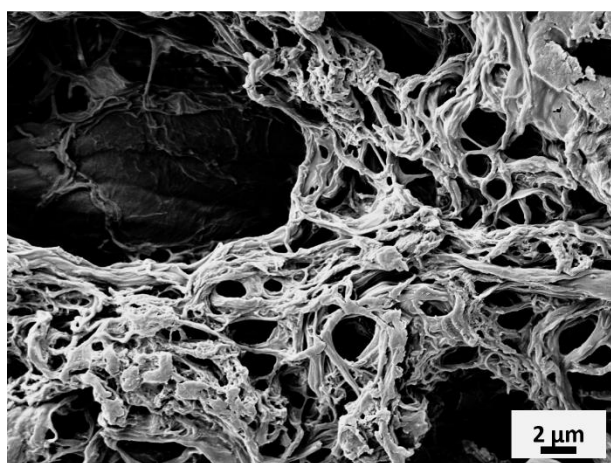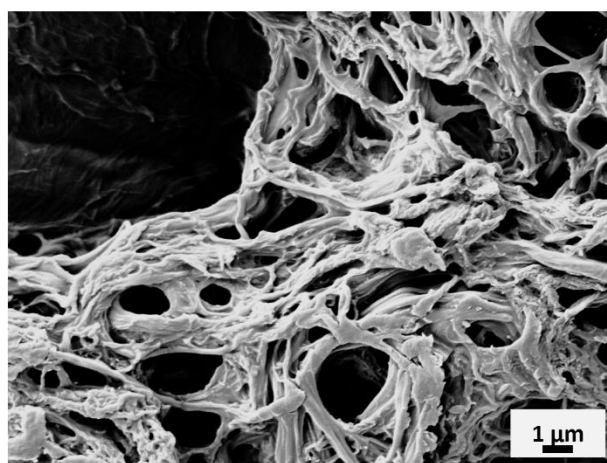

Figure S6. Representative SEM images of PMMA-MetCNFs (50:1:0.06) after removing the non-covalently bound PMMA with DCM and drying in a vacuum oven at 40 °C.

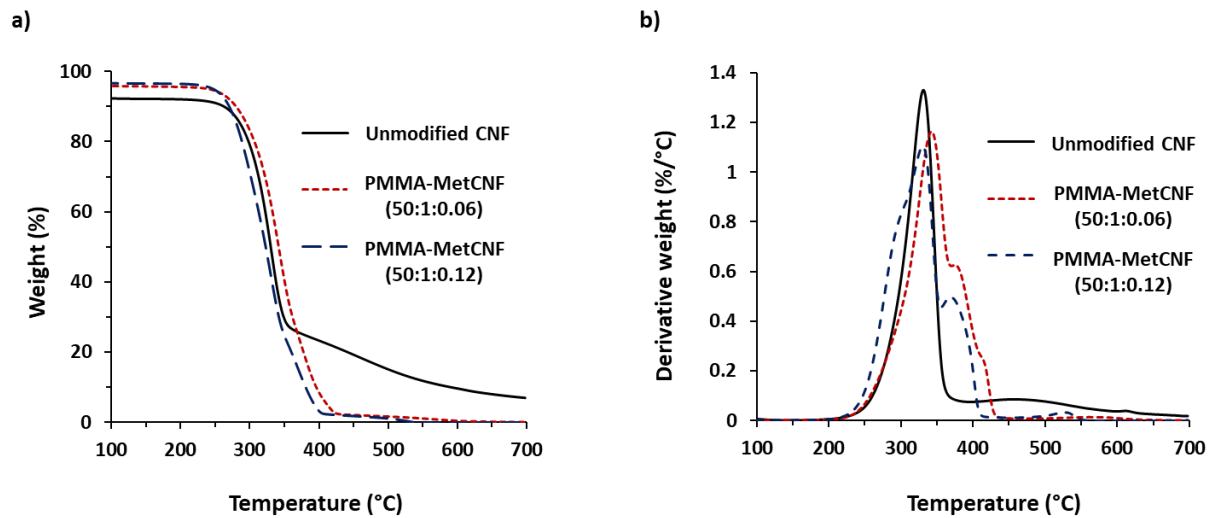

Figure S7. TGA (a) weight loss and (b) derivative weight loss curves of the spray-dried unmodified CNFs and the ground PMMA-MetCNFs without extraction with DCM.

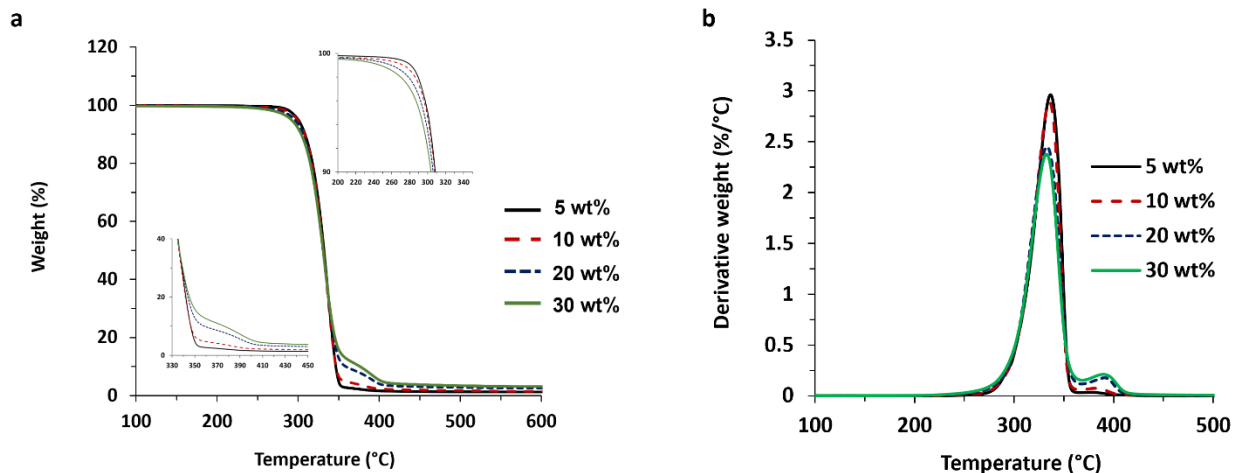

Figure S8. TGA (a) weight loss and (b) derivative weight loss curves of PLA composites reinforced by PMMA-MetCNFs (50:1:0.06).

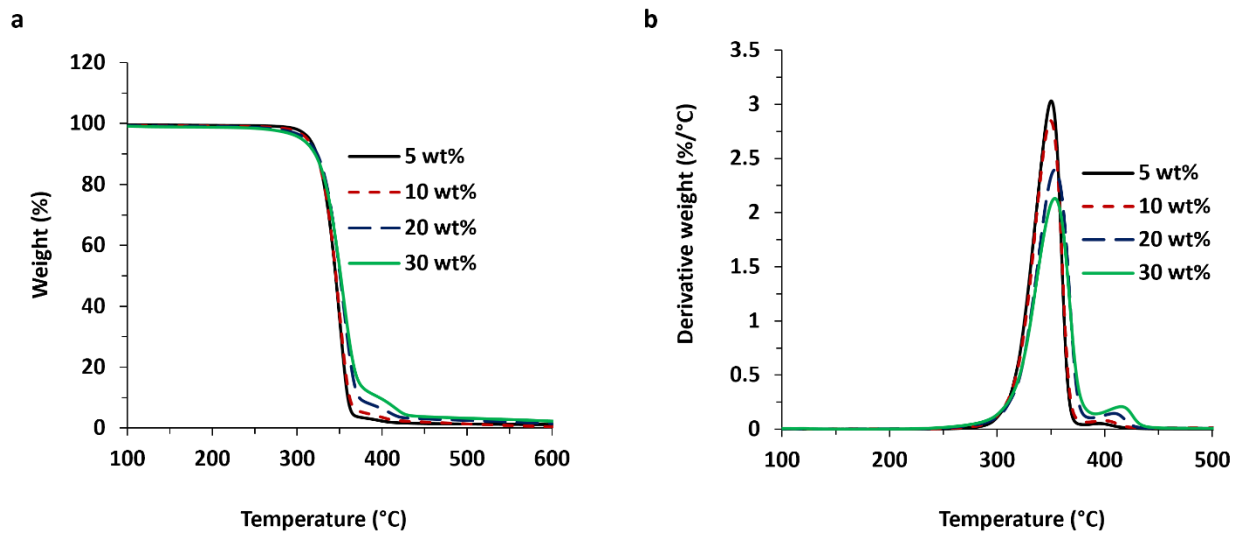

Figure S9. TGA (a) weight loss and (b) derivative weight loss curves of PLA composites reinforced by PMMA-MetCNFs (50:1:0.12).

Table S4. Mechanical properties of neat PLA and PLA composites containing PMMA-MetCNFs with different reinforcement loadings.

| Composite sample        | Reinforcement content (wt%) | Tensile Strength (MPa) | Tensile Modulus (GPa) | % Tensile strength improvement | % Tensile modulus improvement |
|-------------------------|-----------------------------|------------------------|-----------------------|--------------------------------|-------------------------------|
| Neat PLA                | 0                           | 62 ± 3                 | 3.2 ± 0.1             | 0                              | 0                             |
| PMMA-MetCNF (50:1:0.06) | 5                           | 62 ± 4                 | 3.7 ± 0.2             | -1                             | 13                            |
| PMMA-MetCNF (50:1:0.06) | 10                          | 64 ± 4                 | 3.9 ± 0.1             | 3                              | 19                            |
| PMMA-MetCNF (50:1:0.06) | 20                          | 79 ± 3                 | 4.5 ± 0.1             | 27                             | 39                            |
| PMMA-MetCNF (50:1:0.06) | 30                          | 78 ± 5                 | 5.0 ± 0.2             | 26                             | 55                            |
| PMMA-MetCNF (50:1:0.12) | 5                           | 68 ± 2                 | 3.7 ± 0.2             | 9                              | 13                            |
| PMMA-MetCNF (50:1:0.12) | 10                          | 69 ± 3                 | 3.9 ± 0.1             | 10                             | 19                            |
| PMMA-MetCNF (50:1:0.12) | 20                          | 68 ± 3                 | 4.2 ± 0.1             | 9                              | 31                            |
| PMMA-MetCNF (50:1:0.12) | 30                          | 59 ± 7                 | 4.4 ± 0.3             | -6                             | 34                            |

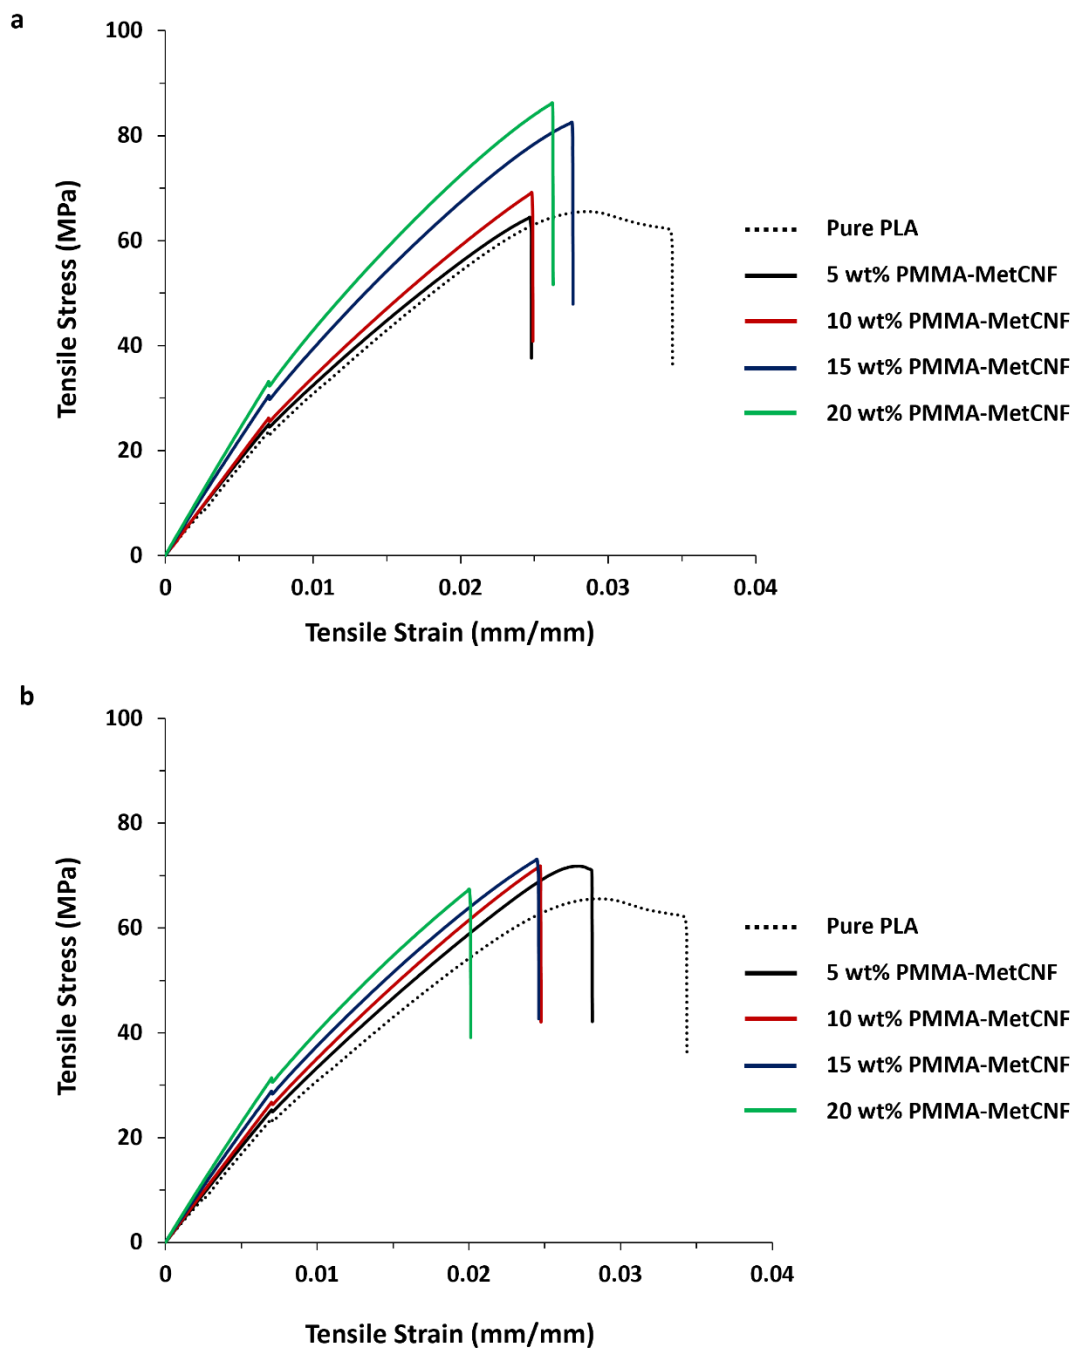

Figure S10. Representative stress-strain curves of pure PLA and PMMA-MetCNF composites for (A) PMMA-MetCNFs (50:1:0.06) and (B) PMMA-MetCNFs (50:1:0.12). The small dip below 0.01 mm/mm resulted from the removal of the extensometer at 0.007 mm/mm.

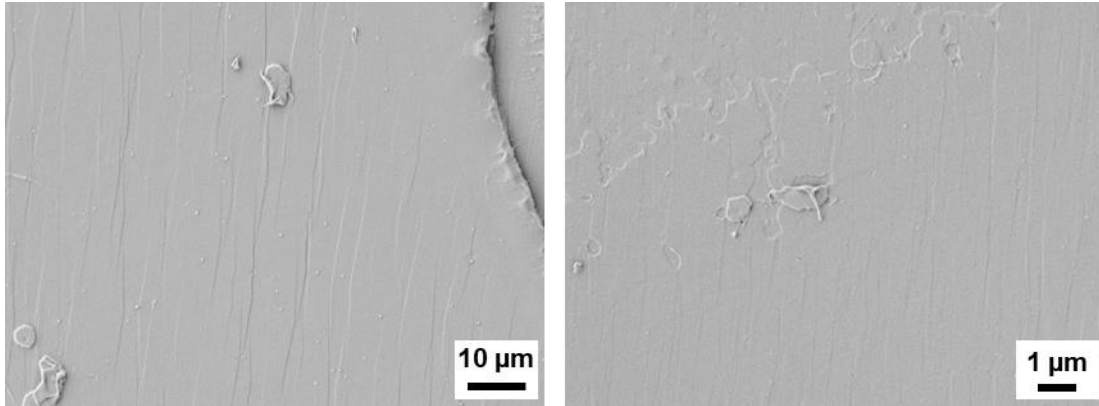

Figure S11. Representative SEM images of PLA fracture surfaces at 1000x (left) and 7000x (right) magnification.



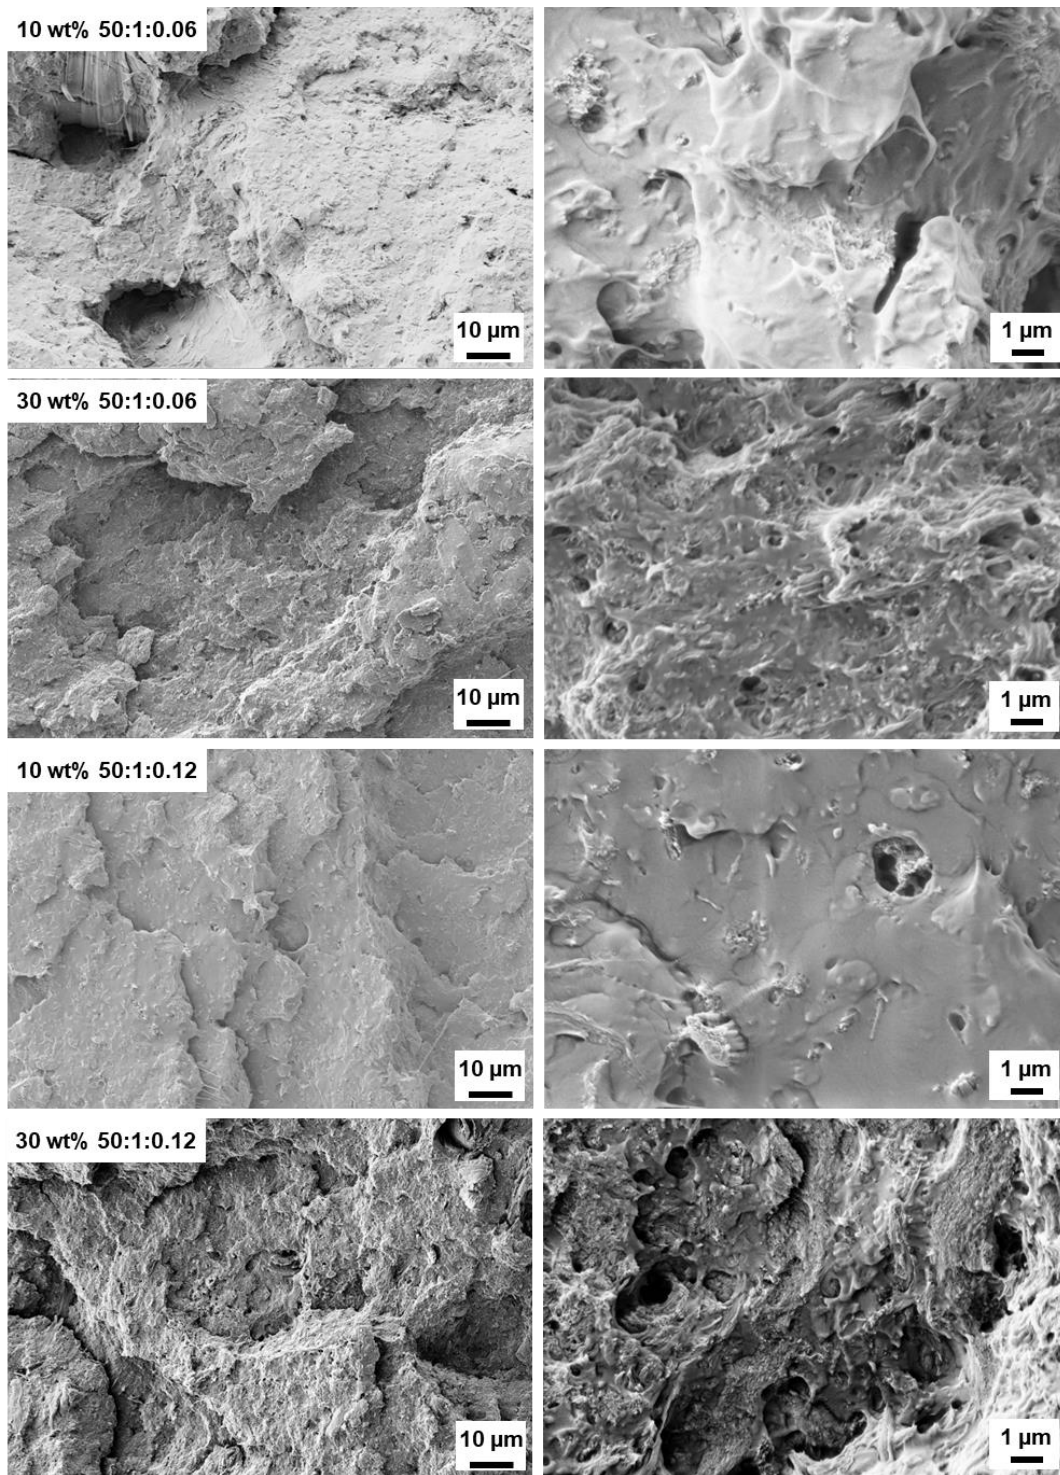

Figure S12. Representative SEM images of tensile bar fracture surfaces of the PMMA-CNF composites with 10 wt% and 30 wt% PMMA-MetCNF reinforcements at 1000x (left images) and 7000x magnification (right images).

Table S5. The thermal properties of pure PLA and PLA composites derived from DSC analysis.

| Sample                  | Wt% fibers | T <sub>g</sub> <sup>a</sup> (°C) | T <sub>cc</sub> <sup>a</sup> (°C) | T <sub>m</sub> <sup>a</sup> (°C) | ΔH <sub>c</sub> <sup>b</sup> (J/g) | ΔH <sub>m</sub> <sup>b</sup> (J/g) | X <sub>c</sub> (%) |
|-------------------------|------------|----------------------------------|-----------------------------------|----------------------------------|------------------------------------|------------------------------------|--------------------|
| Neat PLA                | 0          | 54.4                             | 117.0                             | 151.8                            | 25.7                               | 28.3                               | 2.8                |
| PMMA-MetCNF (50:1:0.06) | 5          | 56.0                             | 105.4                             | 145.4                            | 22.7                               | 23.0                               | 0.3                |
| PMMA-MetCNF (50:1:0.06) | 10         | 56.2                             | 106.6                             | 145.8                            | 19.2                               | 21.4                               | 2.6                |
| PMMA-MetCNF (50:1:0.06) | 20         | 56.4                             | 114.1                             | 147.1                            | 15.6                               | 16.8                               | 1.6                |
| PMMA-MetCNF (50:1:0.06) | 30         | 56.3                             | 124.5                             | 150.1                            | 4.7                                | 5.3                                | 0.9                |
| PMMA-MetCNF (50:1:0.12) | 5          | 55.4                             | 106.7                             | 147.7                            | 23.6                               | 24.4                               | 0.9                |
| PMMA-MetCNF (50:1:0.12) | 10         | 55.6                             | 106.6                             | 145.7                            | 21.5                               | 21.7                               | 0.2                |
| PMMA-MetCNF (50:1:0.12) | 20         | 55.9                             | 114.0                             | 147.6                            | 16.5                               | 17.3                               | 1.1                |
| PMMA-MetCNF (50:1:0.12) | 30         | 56.0                             | 125.2                             | 150.2                            | 1.7                                | 2.0                                | 0.5                |

<sup>a</sup>Obtained from the second heating cycle. <sup>b</sup>Measured from the first heating cycle. The thermal data of the glass transition temperature (T<sub>g</sub>), cold crystallization temperature (T<sub>cc</sub>), and melting temperature (T<sub>m</sub>) were measured from the second heating cycle. The enthalpies of cold crystallization (ΔH<sub>c</sub>) and enthalpies of melting (ΔH<sub>m</sub>) were generated from the first heating cycle. The degree of crystallization (X<sub>c</sub>) was calculated as described in the methods.
